# Supplementary material for: Active oxygen species on Mg–La mixed oxides: the effect of Mg and La oxide interactions
Source: Royal Society of Chemistry journal article supplement (doi:10.1039/c6cy02286c), 2016-12-24
Supplement: c6cy02286c1.pdf [file c6cy02286c1.pdf]

*Supporting Information*

## **Active oxygen species on Mg-La mixed oxides: the effect of Mg and La oxide interactions**

Xianyuan Wu,<sup>a</sup> Zheng Fang,<sup>a</sup> Hui Pan,<sup>b</sup> Yifan Zheng,<sup>a</sup> Dahao Jiang,<sup>a</sup> Jun Ni<sup>\*a</sup> and  
Xiaonian Li<sup>\*a</sup>

*<sup>a</sup>Institute of Industrial Catalysis, College of Chemical Engineering, Zhejiang University of  
Technology, Hangzhou, 310014, China.*

*<sup>b</sup>Institute of Applied Physics and Materials Engineering, University of Macau, China*

*Corresponding author. Tel.: (+86)571 8832 0092; E-mail address: Junni@zjut.edu.cn (J. N.)*

### **This file includes:**

Experimental Methods

Figs. S1 to S11

Tables S1 and S2

## Experimental methods

### Catalyst synthesis

Different particle sized Mg-La mixed oxide catalysts were prepared using modified reverse microemulsion systems [*J. Mater. Chem.*, 2007, **17**, 2257-2266], with the molar ratio of water to surfactant  $\omega = 20, 30, 40$  and  $50$ , respectively. Typically,  $300.00$  g  $\text{Mg}(\text{NO}_3)_2 \cdot 6\text{H}_2\text{O}$  (Aladdin, 99.0%) and  $50.66$  g  $\text{La}(\text{NO}_3)_3 \cdot 6\text{H}_2\text{O}$  (Aladdin, 99.0%) were dissolved in  $401$  ml de-ionized water in  $500$  ml conical flask to make **Solution A**.  $80.00$ g NaOH (Aladdin, 99.99%) were dissolved in  $500$  ml de-ionized water in  $500$  ml volumetric flask to make **Solution B**. To prepare the catalyst with  $\omega = 50$ ,  $48.0$  ml **Solution A** was added dropwisely into  $1661.6$  ml isooctane containing  $23.93$  g sodium dodecylsulfate (SDS) and  $25.26$  g 1-butanol in a  $2$  L three-neck round-bottom flask to make a clear system at temperature of  $60$  °C.  $156$  ml of **Solution B** was then added dropwisely into the former system afterwards. The mixture turned from slightly translucent to milky solids and was further heated at  $60$  °C for  $6$  h. All the above mentioned mixing and reaction processes were carried out with continuous mechanical stirring at  $500$  rpm. The gel-like solids were separated by centrifugation at  $11000$  rpm. In order to remove all the nitrate salts and unreacted SDS, the solids were refluxed in an ethanol–water ( $1 : 1$  in volume) mixture (total volume  $1000$  mL) for  $4$  h before centrifugation. This procedure was repeated ten times. The solid finally obtained was dried in air at temperature of  $80$  °C and hand-ground in an agate mortar to yield a fine powder. It was stored in a desiccator with anhydrous  $\text{CaCl}_2$ . Prior to catalyst characterizations and activity tests, the solid was calcined in air at  $800$  °C for  $1$ h. The prepared catalysts were designated as Mg-La-20, Mg-La-30, Mg-La-40, and Mg-La-50, respectively, in which the number stands for the  $\omega$  value.

### Catalyst characterizations

#### 1. $\text{N}_2$ adsorption-desorption

The BET specific surface area of calcined catalysts was measured from the  $\text{N}_2$  adsorption and desorption isotherms collected on Quantachrome Autosorb-6 at  $77$  K. Prior to the measurement, all samples were degassed at  $300$  °C until a stable vacuum of approximately  $5$  mTorr was reached.

#### 2. Powder X-ray diffraction (XRD)

XRD patterns were collected with a Bruker D8 Advance X-ray diffraction system equipped with  $\text{Cu}_{K\alpha}$  radiation ( $\lambda = 0.154 \text{ nm}$ ), at a step width of  $0.02^\circ$  in the ( $2\theta$ ) range from  $20^\circ$  to  $90^\circ$ . Structure refinement was carried out via the Rietveld method with the JADE 9.0 software until the weighted residual was minimized.

### 3. High resolution transmission electron microscopy (HRTEM)

HRTEM images of Mg-La mixed oxides were acquired in Fei Tecnai G2 TF20 S-twin microscope. The samples were prepared by placing a drop of nanoparticle-ethanol suspension onto a carbon-coated copper grid, then allowing the solvent to evaporate.

### 4. Temperature Programmed Reduction (TPR)

$\text{H}_2$ -TPR was performed on a home-made apparatus equipped with mass spectrometer (HIDEN ANALYTICAL QIC-20), as shown in Fig. S1. The catalysts of 200 mg, which had been thermally treated under Ar stream at  $300^\circ\text{C}$  for 1 h to remove water and other contaminants, were heated from  $30^\circ\text{C}$  to  $800^\circ\text{C}$  at a rate of  $10^\circ\text{C}/\text{min}$  in 50 ml/min of 5% of  $\text{H}_2/\text{Ar}$  and maintained at  $800^\circ\text{C}$  for 10 min, while mass spectrometer signals at m/e of 44, 32, 28, 18, 16 and 2 were monitored.

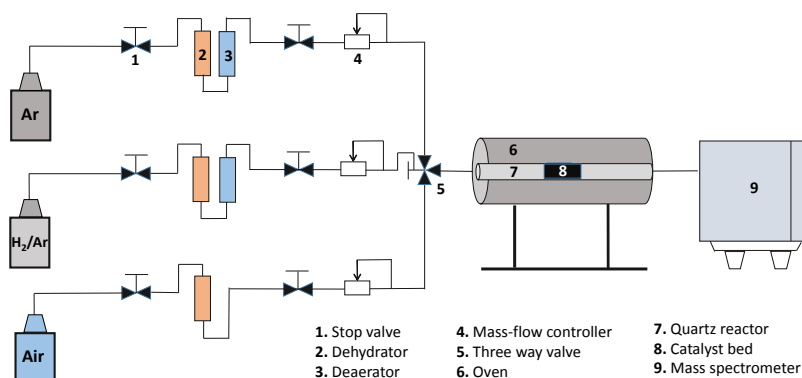

Fig. S1. The configuration of the apparatus used for  $\text{H}_2$ -TPR.

### 5. Temperature Programmed Desorption (TPD)

$\text{O}_2$ -TPD was performed in the same apparatus as above for  $\text{H}_2$ -TPR. The catalysts of 200 mg, which had been thermally treated in air at  $800^\circ\text{C}$  for 1 h, were heated from  $30^\circ\text{C}$  to  $800^\circ\text{C}$  at a rate of  $5^\circ\text{C}/\text{min}$  in 30 ml/min of Ar, while mass spectrometer signals at m/e of 44, 32, 28, 18, 16 and 2 were

monitored.

## **6. X-ray photoelectron spectroscopy (XPS)**

XPS data were obtained with an ESCALab220i-XL electron spectrometer from VG Scientific using 300W Al<sub>Kα</sub> radiation. The base pressure was about 3×10<sup>-9</sup> mbar. The C 1s peak of adventitious carbon at 284.5 eV was used as a reference for energy corrections. All samples were calcined in a special designed system and transferred under Ar protection into the XPS chamber.

## **7. Temperature Programmed Surface Reaction (TPSR)**

CH<sub>4</sub>-TPSR of the catalysts was performed in the same apparatus as above for H<sub>2</sub>-TPR. For each run, 200 mg of the catalyst was placed in the quartz tube. All the samples were first treated with a pure CO<sub>2</sub> flowing at 25 mL/min from ambient to 700°C with a temperature programmed ramping rate 10°C/min. This was followed by cooling down to 120 °C in CO<sub>2</sub> and then Ar flushing at 30 mL/min for 60 min. After this step, a mixture of 10% CH<sub>4</sub>/Ar flowing at 30 ml/min was introduced while the temperature of catalyst bed was increased linearly from 120 to 800 °C at 10 °C/min. Reaction products signals at m/e of 44, 28, 18, 16 and 2 were continuously recorded by the mass spectrometer. The product CO signals were used to monitor the reaction between CH<sub>4</sub> and La<sub>2</sub>O<sub>2</sub>CO<sub>3</sub>. The CO signals were corrected for contribution of CO<sub>2</sub> cracking in the mass spectrometer because the cracking of CO<sub>2</sub> in the MS significantly contributed to the CO MS signals.

## **8. First-principles calculations**

First-principles calculations to investigate the interaction between MgO and La<sub>2</sub>O<sub>3</sub> on the basis of the density functional theory (DFT) [*Phys. Rev.*, 1964, 136, B864-B871] and the Perdew-Burke-Eznerhof generalized gradient approximation (PBE-GGA) [*Phys. Rev. B*, 1994, 50, 17953-17979]. The Vienna ab initio simulation package (VASP) [*Phys. Rev. Lett.*, 1996, 77, 3865-3868] incorporated with projector augmented wave (PAW) scheme [*Phys. Rev. B*, 1999, 59, 1758-1775; *Phys. Rev. B*, 1996, 54, 11169-11186] is used to perform the calculations. K point sampling for integration over the first Brillouin zone is based on the Monkhorst and Pack scheme [*Phys. Rev. B*, 1976, 13, 5188-5192]. A 5×5×5 grid for k-point sampling for geometry optimization and calculations of density of states, respectively, and an energy cut-off of 500 eV are consistently used

in our calculations. Good convergence is obtained with these parameters and the total energy was converged to  $2.0 \times 10^{-5}$  eV/atom.

### 9. Oxidative Coupling of Methane (OCM) activity

The OCM activity was evaluated in a fixed bed quartz tubular reactor with an inner diameter of 8 mm and an online gas chromatograph (GC) for product monitoring equipped with two detectors, a thermal conductivity detector (TCD) and a flame ionization detector (FID). For loading the reactor, 100 mg of catalyst was supported in the quartz reactor tube between two pieces of quartz wool. The catalyst was pretreated in air with 30 ml/min flow rate at 800 °C for 1 h. When the catalyst temperature decreased to 400 °C, the reactant gases ( $\text{CH}_4$  and  $\text{O}_2$ ) and an internal standard  $\text{N}_2$  were fed into the fixed bed reactor at a total rate of 30 ml/min which consist of 20 ml/min methane and 5 ml/min oxygen. The  $\text{CH}_4/\text{O}_2$  feed ratio was held constant at 4:1 for all experiments because this is the stoichiometric amount needed for conversion of methane to ethane and water. A cold trap was placed at the outlet of the quartz reactor to separate any condensed water vapor from the reaction products. The activity and selectivity of catalysts were measured as a function of temperature by increasing the temperature in 100 °C intervals until the temperature reached 800 °C. The methane conversion ( $X_{\text{CH}_4}$ ) is calculated by the difference of the methane entering the reactor system and the unconverted methane in the reactor effluent as determined by the GC (eq 1). The  $\text{C}_2$  selectivity ( $S_{\text{C}_2}$ , eq 2) is the fraction of methane converted to  $\text{C}_2$  products in the total amount of methane converted to  $\text{CO}$ ,  $\text{CO}_2$ , and  $\text{C}_2$  plus  $\text{C}_3$  products. The  $\text{C}_2$  yield ( $Y_{\text{C}_2}$ ), is calculated by multiplying the methane conversion ( $X_{\text{CH}_4}$ ) and the  $\text{C}_2$  selectivity ( $S_{\text{C}_2}$ ) as described in eq 3.

$$X_{\text{CH}_4} = \frac{\text{CH}_{4, \text{in}} - \text{CH}_{4, \text{out}}}{\text{CH}_{4, \text{in}}} \quad (1)$$

$$S_{\text{C}_2} = \frac{\text{mole of CH}_4 \text{ reacted to C}_2 \text{ products}}{\text{mole of CH}_4 \text{ reacted to CO}_x, \text{C}_2, \text{ and C}_3 \text{ products}} \quad (2)$$

$$Y_{\text{C}_2} = X_{\text{CH}_4} \cdot S_{\text{C}_2} \quad (3)$$

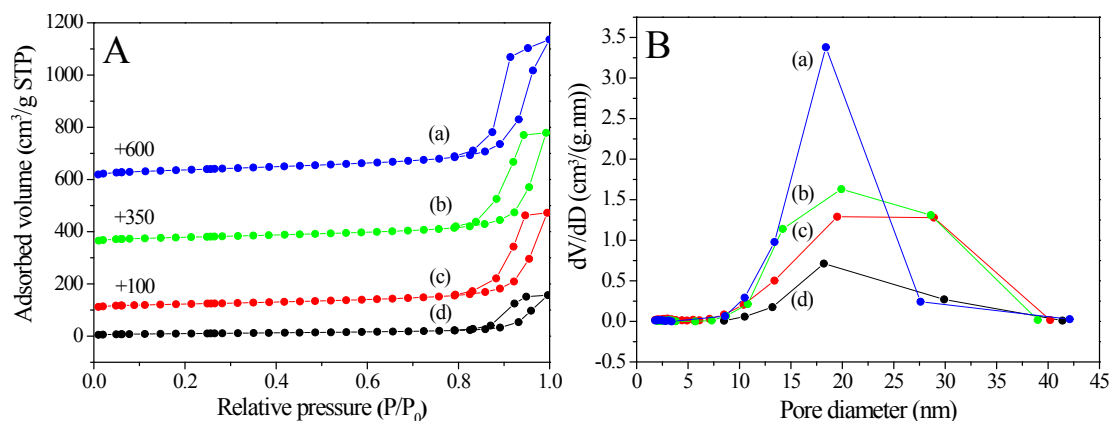

Fig. S2 Nitrogen adsorption–desorption isotherms (A) and pore diameter distributions (B) of the catalysts: (a) Mg-La-20; (b) Mg-La-30; (c) Mg-La-40; (d) Mg-La-50.

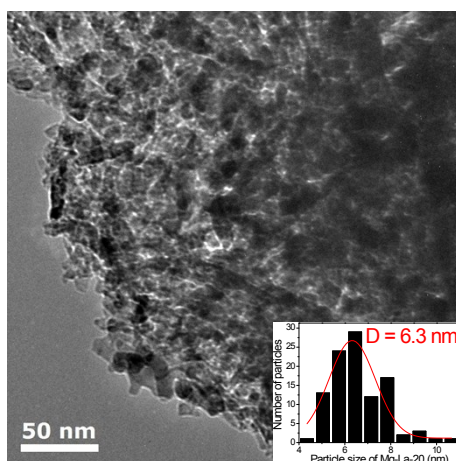

Fig. S3 TEM image of Mg-La-20 catalyst and particle size distribution.

As shown in Fig. S3, the average particle size for the Mg-La-20 catalyst calculated over 100 particles in the TEM image is 6.3 nm.

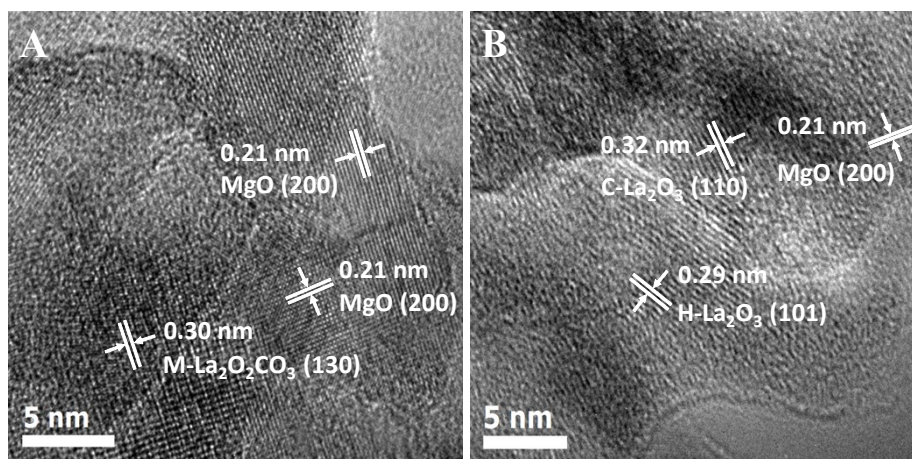

Fig. S4 HRTEM images of Mg-La-20 catalyst.

The presence of  $M\text{-La}_2\text{O}_2\text{CO}_3$  over Mg-La-20 catalyst is shown in Fig. S4A. The close contact of  $M\text{-La}_2\text{O}_2\text{CO}_3$  with MgO, which is the same case between  $C\text{-La}_2\text{O}_3$  and MgO, indicates the formation of  $M\text{-La}_2\text{O}_2\text{CO}_3$  is derived from the reaction of  $C\text{-La}_2\text{O}_3$  with  $\text{CO}_2$ . In contrast, when  $\text{La}_2\text{O}_3$  is far away from MgO, only  $H\text{-La}_2\text{O}_3$  is observed (Fig. S4B). This further emphasizes the importance of intimate interaction between  $\text{La}_2\text{O}_3$  and MgO.

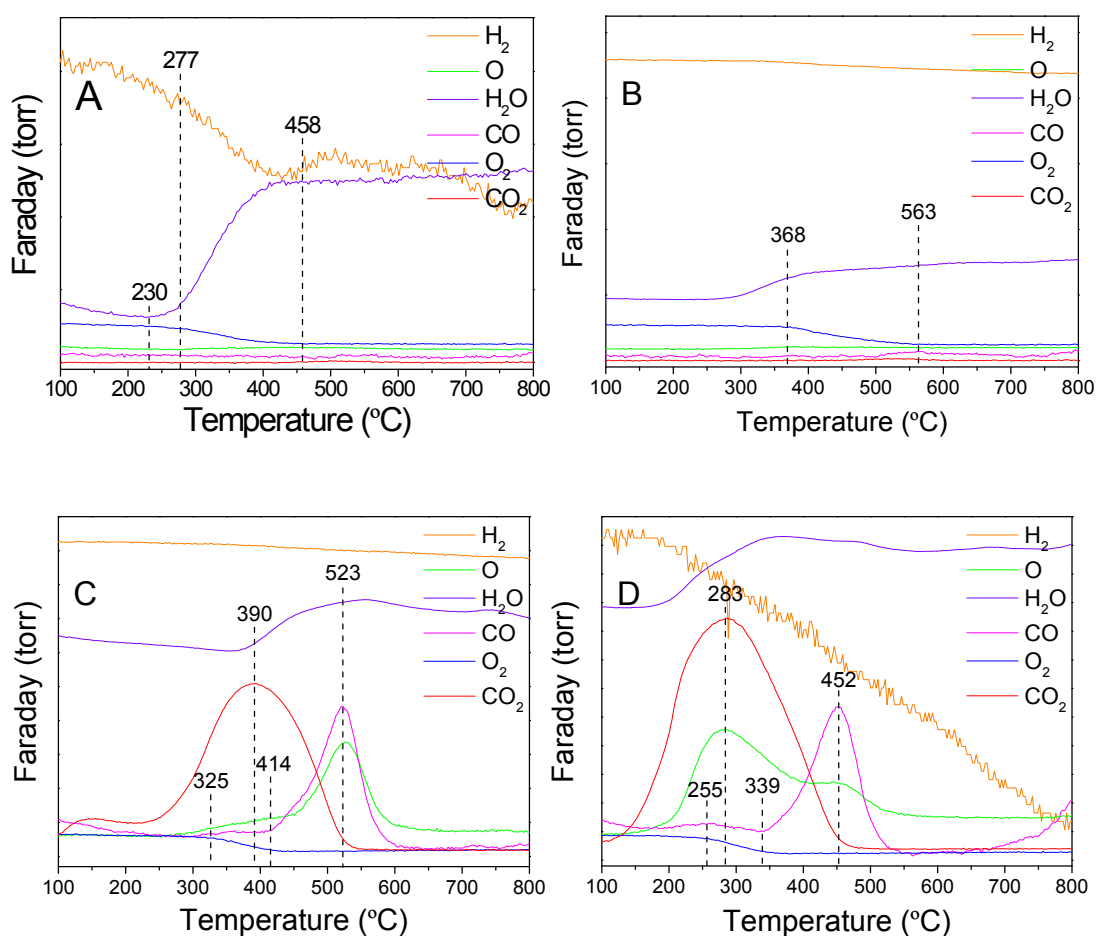

Fig. S5 H<sub>2</sub>-TPR profiles of calcined catalysts: A. Mg-La-50; B. Mg-La-40; C. Mg-La-30; D. Mg-La-20.

The O<sub>2</sub> signals corresponded to the consumption of oxygen remained in the H<sub>2</sub>-TPR apparatus. In the course of H<sub>2</sub>-TPR, the surface adsorbed oxygen species on Mg-La- $\omega$  oxides was firstly reduced and then supplemented by the oxygen via a Mars-van Krevelen mechanism at temperatures lower than 400 °C. The CO and O signals were the result of the reaction of M-La<sub>2</sub>O<sub>2</sub>CO<sub>3</sub> with H<sub>2</sub>, generating CO, La<sub>2</sub>O<sub>3</sub> and H<sub>2</sub>O. And then H<sub>2</sub>O split into H and O in mass spectroscopy. The desorbed CO<sub>2</sub> signals were ascribed to the decomposition of M-La<sub>2</sub>O<sub>2</sub>CO<sub>3</sub> in H<sub>2</sub> at lower temperatures, while at higher temperatures M-La<sub>2</sub>O<sub>2</sub>CO<sub>3</sub> reacted with H<sub>2</sub>.



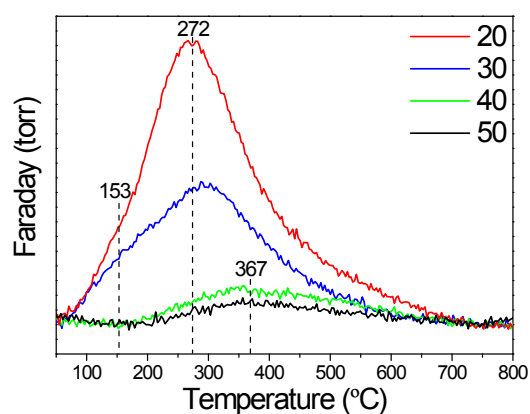

Fig. S6 O<sub>2</sub>-TPD profiles of Mg-La mixed oxide catalysts

O<sub>2</sub>-TPD profiles show the feature of the adsorbed oxygen from Mg-La mixed oxide catalysts. O<sub>2</sub>-TPD was performed with a flow of 30 ml/min Ar and a heating rate of 5 °C /min to 800 °C. Three distinct desorption peaks of oxygen from the Mg-La-20 catalyst are observed: a shoulder peak at 153 °C should be attributed to the desorption of adsorbed molecular species, a strong symmetric peak and another shoulder peak at 272 and 367 °C can be correlated to the desorption of adsorbed surface oxygen species O<sub>2</sub><sup>-</sup> and O<sup>-</sup>, respectively [Catal. Today, 1990, 6, 473; Nanoscale, 2013, 5, 10844-10848]. There is only a faint broad peak centered at 367 °C detected on the Mg-La-40 and Mg-La-50 catalysts, indicating much less amount of oxygen species than Mg-La-30 and Mg-La-20 catalysts.

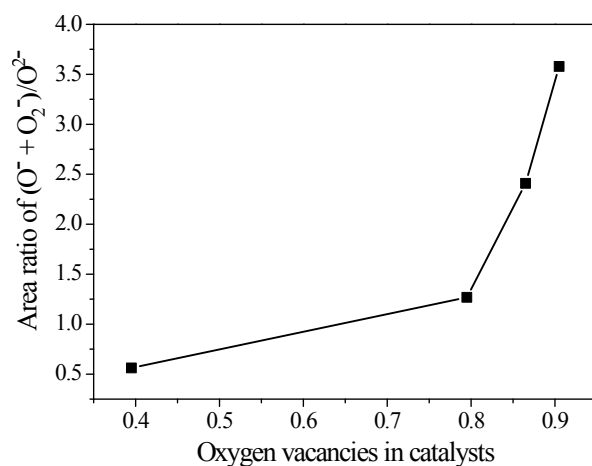

Fig. S7 Correlation between the oxygen vacancies with the relative contents of surface adsorbed oxygen species.

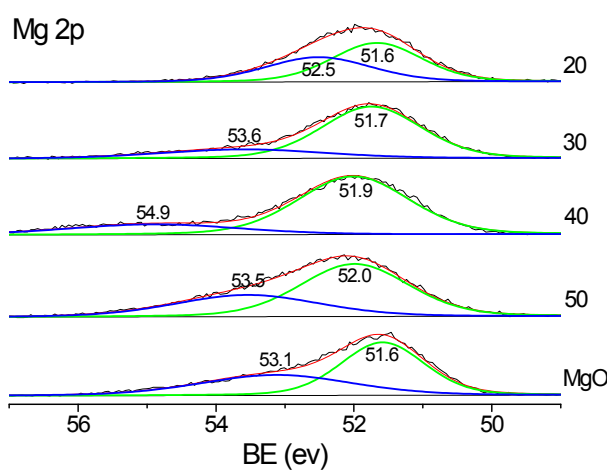

Fig. S8 O1s binding energy spectra of Mg-La mixed oxide catalysts and MgO.

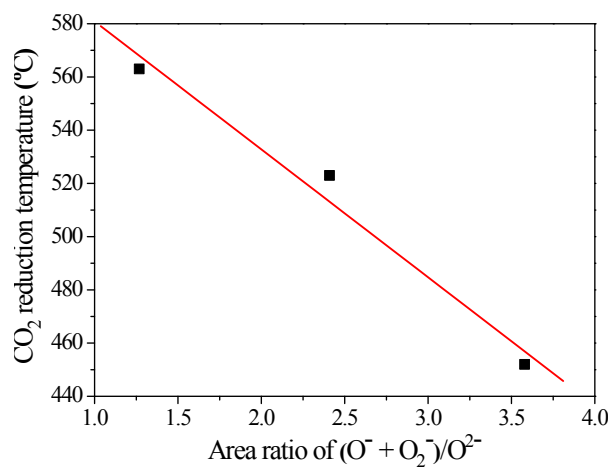

Fig. S9 Correlation between the relative contents of surface adsorbed oxygen species with CO<sub>2</sub> reduction temperatures.

Table S1 Lattice parameters for pure oxides and doped oxides

|                       | MgO        | C-La <sub>2</sub> O <sub>3</sub> | La-doped MgO | H-La <sub>2</sub> O <sub>3</sub> | Mg-doped H-La <sub>2</sub> O <sub>3</sub> |
|-----------------------|------------|----------------------------------|--------------|----------------------------------|-------------------------------------------|
| Lattice Constant (nm) | a = 0.4245 | a = 1.1397                       | a = 0.4530   | a = 0.3939<br>c = 0.6136         | a = 0.38807<br>c = 0.62569                |

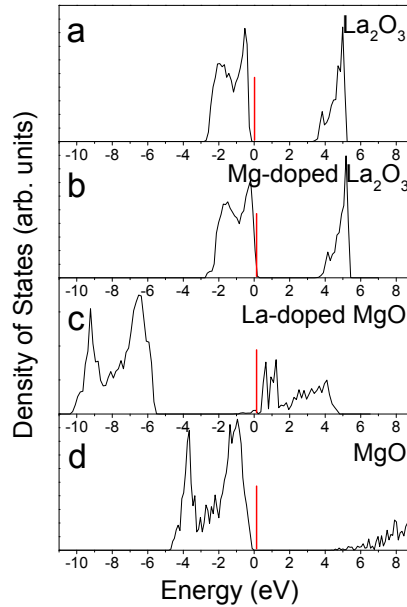

Fig. S10 Densities of states for cubic La<sub>2</sub>O<sub>3</sub>, Mg doped La<sub>2</sub>O<sub>3</sub>, La doped MgO and MgO.

First-principles calculations were utilized to investigate the interaction between MgO and La<sub>2</sub>O<sub>3</sub> on the basis of the density functional theory (DFT) and the Perdew-Burke-Eznerhof generalized gradient approximation (PBE-GGA). Because it is very difficult to build a model for Mg-La mixed oxides, instead we investigated the cases where MgO was doped with La and La<sub>2</sub>O<sub>3</sub> was doped with Mg. As shown in Table S1, the lattice parameters are obtained by relaxing MgO and cubic La<sub>2</sub>O<sub>3</sub> unit cell. A 2×2×2 supercell of MgO is used to investigate the effect of La incorporation on its lattice constant. The calculated lattice constants show that La-doping leads to the expansion of the lattice of MgO by 6.7% at a doping concentration of 12.5%. Similarly, Mg-doping also results in the expansion of the lattice of H-La<sub>2</sub>O<sub>3</sub> by 1.97% at a doping concentration of 12.5%. The calculated total density of states (TDOSs) shows that La<sub>2</sub>O<sub>3</sub> (Fig. S10a) and MgO (Fig. S10d) are insulators/semiconductors with band gap larger than 3.5 eV. The doping of La into MgO introduces electrons into MgO, as indicated by the Fermi level (red line at 0 eV) in the bottom conduction band (Fig. S10c), while the doping of Mg into La<sub>2</sub>O<sub>3</sub> introduces vacancies into La<sub>2</sub>O<sub>3</sub>, as indicated by the Fermi level in the valence band (Fig. S10b). Both results suggest the charge transfer from La<sub>2</sub>O<sub>3</sub> to MgO in the heterojunctions. Combining the results from Rietveld refinements of the XRD patterns (Table S2), we realized that it is the doping of Mg into cubic La<sub>2</sub>O<sub>3</sub>, which introduces vacancies into La<sub>2</sub>O<sub>3</sub>, facilitates the charge transfer from La<sub>2</sub>O<sub>3</sub> to MgO.

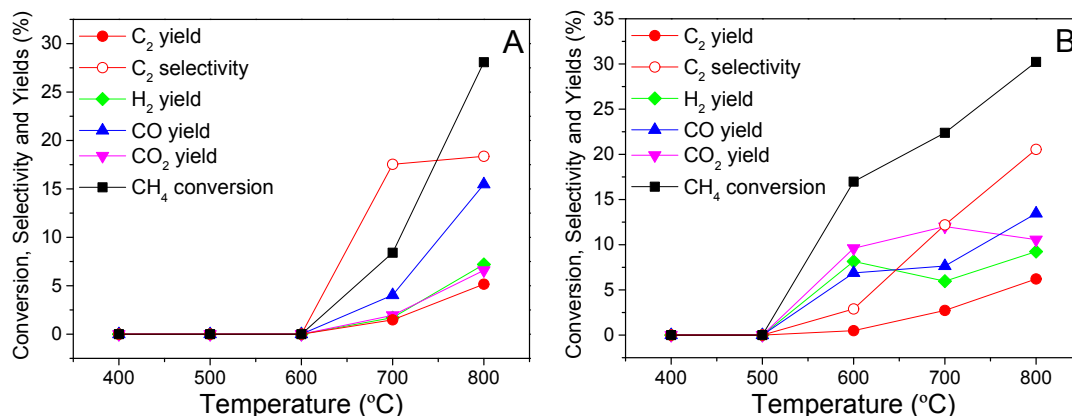

Fig. S11 Reaction data during oxidative coupling of methane as a function of temperature obtained over (A) MgO and (B) Mg-La-20 catalysts at a CH<sub>4</sub>/O<sub>2</sub> ratio of 4:1.

The oxidative coupling of methane (OCM) activity was evaluated in a fixed bed quartz tubular reactor with at a CH<sub>4</sub>/O<sub>2</sub> ratio of 4:1 (20 ml/min methane and 5 ml/min oxygen) at atmospheric pressure. MgO has been used as a reference catalyst for the comparison with Mg-La-20 catalyst. The methane conversion, ethane and ethylene (C<sub>2</sub>) selectivity and yield, and the yields for H<sub>2</sub>, CO and CO<sub>2</sub> are displayed in Fig. S11. The Mg-La-20 catalyst has a lower onset temperature for OCM reaction than MgO, and superior performance in both methane conversion and C<sub>2</sub> yield. Apart from C<sub>2</sub> products, the Mg-La-20 catalyst also produces higher amounts of CO and CO<sub>2</sub>, indicating that the Mg-La-20 catalyst has higher amounts of surface adsorbed oxygen species for oxidation reactions.

Table S2 Phase composition, mass fraction and unit cell parameters of Mg-La mixed oxide catalysts.

| Catalyst                                                                                                                                                                                                                                                                                                                | Phase composition                         | Mass fraction (%) | Unit cell parameters (nm) |          |          |
|-------------------------------------------------------------------------------------------------------------------------------------------------------------------------------------------------------------------------------------------------------------------------------------------------------------------------|-------------------------------------------|-------------------|---------------------------|----------|----------|
|                                                                                                                                                                                                                                                                                                                         |                                           |                   | <i>a</i>                  | <i>b</i> | <i>c</i> |
| Mg-La-20                                                                                                                                                                                                                                                                                                                | Cubic MgO                                 | 50.4              | 0.42126                   | 0.42126  | 0.42126  |
|                                                                                                                                                                                                                                                                                                                         | Hexagonal La <sub>2</sub> O <sub>3</sub>  | 3.6               | 0.392809                  | 0.392809 | 0.613349 |
|                                                                                                                                                                                                                                                                                                                         | Cubic La <sub>2</sub> O <sub>3</sub>      | 28.2              | 1.160569                  | 1.160569 | 1.160569 |
|                                                                                                                                                                                                                                                                                                                         | Monoclinic La <sub>2</sub> O <sub>3</sub> | 17.8              | 1.576812                  | 0.386539 | 0.876135 |
| Mg-La-30                                                                                                                                                                                                                                                                                                                | Cubic MgO                                 | 66.6              | 0.422437                  | 0.422437 | 0.422437 |
|                                                                                                                                                                                                                                                                                                                         | Hexagonal La <sub>2</sub> O <sub>3</sub>  | 6.9               | 0.394856                  | 0.394856 | 0.616316 |
|                                                                                                                                                                                                                                                                                                                         | Cubic La <sub>2</sub> O <sub>3</sub>      | 21.4              | 1.169661                  | 1.169661 | 1.169661 |
|                                                                                                                                                                                                                                                                                                                         | Monoclinic La <sub>2</sub> O <sub>3</sub> | 5.1               | 1.591324                  | 0.388081 | 0.881544 |
| Mg-La-40                                                                                                                                                                                                                                                                                                                | Cubic MgO                                 | 55.5              | 0.421584                  | 0.421584 | 0.421584 |
|                                                                                                                                                                                                                                                                                                                         | Hexagonal La <sub>2</sub> O <sub>3</sub>  | 14.2              | 0.393591                  | 0.393591 | 0.614109 |
|                                                                                                                                                                                                                                                                                                                         | Cubic La <sub>2</sub> O <sub>3</sub>      | 17.0              | 1.146691                  | 1.146691 | 1.146691 |
|                                                                                                                                                                                                                                                                                                                         | Monoclinic La <sub>2</sub> O <sub>3</sub> | 13.4              | 1.567144                  | 0.389286 | 0.876907 |
| Mg-La-50                                                                                                                                                                                                                                                                                                                | Cubic MgO                                 | 52.6              | 0.421732                  | 0.421732 | 0.421732 |
|                                                                                                                                                                                                                                                                                                                         | Hexagonal La <sub>2</sub> O <sub>3</sub>  | 17.5              | 0.393949                  | 0.393949 | 0.614565 |
|                                                                                                                                                                                                                                                                                                                         | Cubic La <sub>2</sub> O <sub>3</sub>      | 12.7              | 1.134347                  | 1.134347 | 1.134347 |
|                                                                                                                                                                                                                                                                                                                         | Monoclinic La <sub>2</sub> O <sub>3</sub> | 17.2              | 1.575348                  | 0.390484 | 0.876243 |
| Cubic MgO: Fm-3m (225), Z=4, cF8 [PDF#98-000-0349]; Hexagonal La <sub>2</sub> O <sub>3</sub> : P-3m1 (164), Z=1, hP5 [PDF#04-005-5955]; Cubic La <sub>2</sub> O <sub>3</sub> : Ia-3 (206), Z=16, cI80 [PDF#00-022-0369]; Monoclinic La <sub>2</sub> O <sub>3</sub> : C2/m (12) <b-unique>, Z=6, mC30 [PDF#04-002-3877]. |                                           |                   |                           |          |          |

The structure refinement results show that with the decrease in  $\omega$  value, the mass fraction of hexagonal La<sub>2</sub>O<sub>3</sub> decreases from 17.5 wt% for Mg-La-50 to 3.6 wt% for Mg-La-20, whereas the mass fraction of cubic La<sub>2</sub>O<sub>3</sub> increases from 12.7 wt% for Mg-La-50 to 28.2 wt% for Mg-La-20. Meanwhile the mass fraction of monoclinic La<sub>2</sub>O<sub>3</sub> varies relatively insignificantly, the presence of which has been recognized as active sites for the combustion of propene at 673 K [*Chem. Lett.*, 1986, 1333-1336]. The formation of monoclinic La<sub>2</sub>O<sub>3</sub> is supposed to be the result of strong interaction of MgO with La<sub>2</sub>O<sub>3</sub>, although the reason for its formation is not certain.

Comparing with the lattice constant of MgO (0.4245 nm), all the lattice constants of MgO in Mg-La mixed oxides reduce to different extents. Smaller lattice constant of MgO can be obtained when decreasing the  $\omega$  value. On the other hand, the lattice constant of cubic La<sub>2</sub>O<sub>3</sub> increases from 1.13270 nm for pure cubic La<sub>2</sub>O<sub>3</sub> and 1.134347 nm for Mg-La-50 to 1.160569 nm for Mg-La-20. Approximately 2.31% expansion of the cubic La<sub>2</sub>O<sub>3</sub> lattice is observed. Our theoretical calculations (Table S1 and Fig. S10) have revealed the La-doping into MgO leads to the expansion of MgO lattice by 6.7% at a doping concentration of 12.5%. Similarly, Mg-doping into H-La<sub>2</sub>O<sub>3</sub> also results in the expansion of H-La<sub>2</sub>O<sub>3</sub> lattice by 1.97% at a doping concentration of 12.5%. Thus, the contraction of MgO lattice and the expansion of cubic La<sub>2</sub>O<sub>3</sub> lattice both indicate that there is a Mg-doping into cubic La<sub>2</sub>O<sub>3</sub> over Mg-La mixed oxides. The intimate contact between MgO and La<sub>2</sub>O<sub>3</sub> is favorable for this doping, and benefits the formation of vacancies in La<sub>2</sub>O<sub>3</sub>, as a result of which also the charge transfer from La<sub>2</sub>O<sub>3</sub> to MgO in the heterojunctions.
